# Supplementary material for: Target-specific requirements for RNA interference can arise through restricted RNA amplification despite the lack of specialized pathways
Source: eLife. 2024 Aug 20;13:RP97487. doi: 10.7554/eLife.97487 (PMC11335349; doi:10.7554/eLife.97487)
Supplement: Figure 1—source data 2. [file elife-97487-fig1-data2.xlsx]

## Sheet: Sheet1
Strain	unc-twitch	non-unc	blister	non-blister	L4440_unc-bli	L4440_none
N2	32	1	73	25	0	45
N2	55	1	37	11	0	33
N2	35	0			0	38
AMJ1397	28	1	0	32	0	48
AMJ1397	29	0	0	14	0	38
AMJ1397	9	0	0	29
AMJ1397	37	1	0	38
AMJ1470	0	29	0	34	0	44
AMJ1470	0	31	0	18	0	40
AMJ1470	0	29	0	32	0	30
AMJ1470	0	17	0	43
AMJ1489	28	1	0	25	0	46
AMJ1489	23	1	0	22	0	26
AMJ1489	36	2	0	17	0	31
