# Supplementary material for: Target-specific requirements for RNA interference can arise through restricted RNA amplification despite the lack of specialized pathways
Source: eLife. 2024 Aug 20;13:RP97487. doi: 10.7554/eLife.97487 (PMC11335349; doi:10.7554/eLife.97487)
Supplement: Figure 2—source data 1. [file elife-97487-fig2-data1.xlsx]

## Sheet: Sheet1
Strain	blistered	non.bli	twitch	non.unc	unc54	non.unc54	defect_L4440	wt_L4440
N2	53	28	37	1	43	2	0	20
N2	43	20	28	1	44	2	0	29
N2	32	23	32	0	21	0	0	25
N2	13	28			44	2	0	23
N2	31	24	30	0	12	1	0	30
AMJ1510	2	28	22	0	13	31
AMJ1510	2	73	23	0	18	66
AMJ1510	5	58	18	2	7	33
AMJ1510	2	54	20	0	8	41
AMJ1510	5	45	25	0	3	43
AMJ1545	0	15	0	29	0	37
AMJ1545	0	43	0	13	0	29
AMJ1545	0	9	0	18	0	26
AMJ1545	0	27	0	13	0	49
AMJ1545	0	27	0	28	0	25
AMJ1568	0	46	0	33	0	58
AMJ1568	0	35	0	32	0	41
AMJ1568	0	47			0	33
AMJ1568	0	53	0	27	0	40
AMJ1568	0	38	0	19	0	34
