# Supplementary material for: Target-specific requirements for RNA interference can arise through restricted RNA amplification despite the lack of specialized pathways
Source: eLife. 2024 Aug 20;13:RP97487. doi: 10.7554/eLife.97487 (PMC11335349; doi:10.7554/eLife.97487)
Supplement: Figure 3—figure supplement 1—source data 6. [file elife-97487-fig3-figsupp1-data6.xlsx]

## Sheet: Sheet1
TBB-2 gel measurements
Strain and region measured	Region measured		Area	Mean	Min	Max		Area* (Mean of band- mean of background)	Ratio of rde-4 to tbb-2	Setting N2 to be 1 (ratio of each strain/ ratio of N2)	Removing the background rde-4(-) value
N2	band	1	0.084	127.609	58	247		4.91837	0.528488	1
	background	2	0.084	69.057	57	87
WM49	band	3	0.084	136.228	68	240		5.03647	0.278198	0.526403	0
	background	4	0.084	76.27	64	98
RDE-4 gel measurements
Strain and region measured			Area	Mean	Min	Max
N2	band	1	0.087	62.074	31	118		2.5993
	background	2	0.087	32.197	24	43
WM49	band	3	0.087	49.355	33	73		1.40113
	background	4	0.087	33.25	25	45
AMJ565	band	5	0.087	53.576	35	78		1.47526
	background	6	0.087	36.619	27	50
