# Supplementary material for: Target-specific requirements for RNA interference can arise through restricted RNA amplification despite the lack of specialized pathways
Source: eLife. 2024 Aug 20;13:RP97487. doi: 10.7554/eLife.97487 (PMC11335349; doi:10.7554/eLife.97487)
Supplement: Figure 3—source data 1. [file elife-97487-fig3-data1.xlsx]

## Sheet: Sheet1
Strain	bli	non.bli			Strain	bli	non.bli	total	Strain	bli	non.bli	total
N2	84	35			N2	134	66	200	N2	219	85	304
N2	55	15			GR1373	145	55	200	L4440	0	157	157
N2	42	11			AMJ489	167	33	200	GR1373	169	44	213
N2	38	24							AMJ1660	187	32	219
L4440	0	41							AMJ1661	123	42	165
L4440	0	53							AMJ1510	3	140	143
L4440	0	37							AMJ1621	130	39	169
L4440	0	26							AMJ1489	0	172	172
GR1373	56	11							AMJ1614	0	162	162
GR1373	51	7							AMJ1622	0	171	171
GR1373	25	17							AMJ1623	0	183	183
GR1373	37	9							AMJ1397	0	110	110
AMJ1660	38	3							AMJ1675	0	123	123
AMJ1660	60	15							AMJ1672	0	130	130
AMJ1660	24	7							AMJ1673	0	88	88
AMJ1660	65	7							AMJ1674	0	111	111
AMJ1661	43	13
AMJ1661	29	6
AMJ1661	24	15
AMJ1661	27	8
AMJ1510	2	50
AMJ1510	1	43
AMJ1510	0	47
AMJ1621	40	8
AMJ1621	30	17
AMJ1621	30	9
AMJ1621	30	5
AMJ1489	0	49
AMJ1489	0	43
AMJ1489	0	50
AMJ1489	0	30
AMJ1614	0	41
AMJ1614	0	39
AMJ1614	0	44
AMJ1614	0	38
AMJ1622	0	57
AMJ1622	0	40
AMJ1622	0	42
AMJ1622	0	32
AMJ1623	0	45
AMJ1623	0	45
AMJ1623	0	54
AMJ1623	0	39
AMJ1397	0	41
AMJ1397	0	17
AMJ1397	0	31
AMJ1397	0	21
AMJ1675	0	26
AMJ1675	0	32
AMJ1675	0	37
AMJ1675	0	28
AMJ1672	0	35
AMJ1672	0	37
AMJ1672	0	30
AMJ1672	0	28
AMJ1673	0	17
AMJ1673	0	24
AMJ1673	0	21
AMJ1673	0	26
AMJ1674	0	23
AMJ1674	0	38
AMJ1674	0	27
AMJ1674	0	23
