# Supplementary material for: Target-specific requirements for RNA interference can arise through restricted RNA amplification despite the lack of specialized pathways
Source: eLife. 2024 Aug 20;13:RP97487. doi: 10.7554/eLife.97487 (PMC11335349; doi:10.7554/eLife.97487)
Supplement: Figure 3—source data 2. [file elife-97487-fig3-data2.xlsx]

## Sheet: Sheet1
Strain	twitch	non.unc			totals	twitch	non.unc
N2	58	0			N2	144	0
N2	41	0			L4440	0	115
N2	45	0			GR1373	105	0
L4440	0	33			AMJ1660	127	0
L4440	0	44			AMJ1661	151	0
L4440	0	38			AMJ1470	0	32
GR1373	42	0			AMJ1611	1	116
GR1373	18	0			AMJ1657	9	75
GR1373	19	0			AMJ1658	0	56
GR1373	26	0			AMJ1659	1	50
AMJ1660	37	0			AMJ1568	6	107
AMJ1660	44	0			AMJ1624	4	135
AMJ1660	46	0			AMJ1625	14	112
AMJ1661	32	0			AMJ1545	4	24
AMJ1661	51	0			AMJ1631	1	52
AMJ1661	23	0			AMJ1632	0	57
AMJ1661	45	0			AMJ1489	66	44
AMJ1470	0	32			AMJ1622	99	22
AMJ1611	1	17			AMJ1623	99	18
AMJ1611	0	39
AMJ1611	0	31
AMJ1611	0	29
AMJ1657	0	22
AMJ1657	8	13
AMJ1657	0	24
AMJ1657	1	16
AMJ1658	0	14
AMJ1658	0	24
AMJ1658	0	18
AMJ1658	1	51
AMJ1659	0	21
AMJ1659	0	13
AMJ1659	1	16
AMJ1568	0	41
AMJ1568	2	32
AMJ1568	1	22
AMJ1568	3	28
AMJ1624	1	51
AMJ1624	2	52
AMJ1624	1	32
AMJ1625	4	38
AMJ1625	5	27
AMJ1625	5	47
AMJ1545	4	24
AMJ1631	1	52
AMJ1632	0	32
AMJ1632	0	25
AMJ1489	17	20
AMJ1489	37	11
AMJ1489	12	13
AMJ1622	26	7
AMJ1622	46	7
AMJ1622	27	8
AMJ1623	41	7
AMJ1623	23	8
AMJ1623	35	3
