# Supplementary material for: Target-specific requirements for RNA interference can arise through restricted RNA amplification despite the lack of specialized pathways
Source: eLife. 2024 Aug 20;13:RP97487. doi: 10.7554/eLife.97487 (PMC11335349; doi:10.7554/eLife.97487)
Supplement: Figure 3—source data 3. [file elife-97487-fig3-data3.xlsx]

## Sheet: rde-1
Strain Name	Wilson's Estimates with continuity correction (Method 4 in Newcombe RG, Statist. Med. 17, 857Ð872 (1998))
	N	Number +ve	p (proportion +ve)	q (proportion -ve)	z (value for 95% Conf.)	Lower limit	Upper limit	p-lower limit	Upper limit - p
unc-22 feed- F1 only
N2 males	25	25	1	0	1.96	0.834223	1	0.165777	0
WM27 herms	25	0	0	1	1.96	0	0.165777	0	0.165777
F1progeny w/ gfp males (rde-1(-); Peft-3::gfp/+)	25	0	0	1	1.96	0	0.165777	0	0.165777
F1progeny w/o gfp males (rde-1(-); Pmex-5::rde-1/+) the 2 twitched only at the tail and was weak	24	2	0.0833333	0.916667	1.96	0.0145664	0.284716	0.0687669	0.201383
bli-1 feed- F1 only
N2 males	50	41	0.82	0.18	1.96	0.680783	0.909517	0.139217	0.089517
WM27 herms	37	0	0	1	1.96	0	0.117133	0	0.117133
F1progeny w/ gfp males (rde-1(-); Peft-3::gfp/+)	41	0	0	1	1.96	0	0.106697	0	0.106697
F1progeny w/o gfp males (rde-1(-); Pmex-5::rde-1/+)	33	0	0	1	1.96	0	0.129833	0	0.129833
	Wilson's Estimates with continuity correction (Method 4 in Newcombe RG, Statist. Med. 17, 857Ð872 (1998))
	N	Number +ve	p (proportion +ve)	q (proportion -ve)	z (value for 95% Conf.)	Lower limit	Upper limit	p-lower limit	Upper limit - p
	40	40	1	0	1.96	0.890872	1	0.109128	0
	33	0	0	1	1.96	0	0.129833	0	0.129833
	Pooled N	Pooled num +	Pooled p	Pooled SE	z (>=1.96 for 95% Conf)	P-value
	73	40	0.547945	0.117041	8.544	0
	unc-22			bli-1
	comparison	pvalue		comparison	pvalue
	N2 males vs. F1 gfp progeny	0		N2 males vs. F1 gfp progeny	0	***compared to N2 males from rde4 spreadsheet
	N2 males vs. F1 resuce progeny	1.12596e-10		N2 males vs. F1 resuce progeny	0

## Sheet: rde-4
Strain Name	Wilson's Estimates with continuity correction (Method 4 in Newcombe RG, Statist. Med. 17, 857Ð872 (1998))
	N	Number +ve	p (proportion +ve)	q (proportion -ve)	z (value for 95% Conf.)	Lower limit	Upper limit	p-lower limit	Upper limit - p
unc-22 feed- F1 only
N2 males	25	25	1	0	1.96	0.834223	1	0.165777	0
WM49 herms	25	0	0	1	1.96	0	0.165777	0	0.165777
F1progeny w/ gfp males (rde-4(-); Peft-3::gfp/+)	25	0	0	1	1.96	0	0.165777	0	0.165777
F1progeny w/o gfp males (rde-4(-); Pmex-5::rde-4/+) those that twitched were weak but N2 was very strong	24	16	0.666667	0.333333	1.96	0.446922	0.835737	0.219745	0.16907
bli-1 feed- F1 only
N2 males	40	40	1	0	1.96	0.890872	1	0.109128	0
WM49 herms	50	0	0	1	1.96	0	0.0888782	0	0.0888782
F1progeny w/ gfp males (rde-4(-); Peft-3::gfp/+)	32	0	0	1	1.96	0	0.13345	0	0.13345
F1progeny w/o gfp males (rde-4(-); Pmex-5::rde-4/+)	41	41	1	0	1.96	0.893303	1	0.106697	0
	Wilson's Estimates with continuity correction (Method 4 in Newcombe RG, Statist. Med. 17, 857Ð872 (1998))
	N	Number +ve	p (proportion +ve)	q (proportion -ve)	z (value for 95% Conf.)	Lower limit	Upper limit	p-lower limit	Upper limit - p
	25	0	0	1	1.96	0	0.165777	0	0.165777
	24	16	0.666667	0.333333	1.96	0.446922	0.835737	0.219745	0.16907
	Pooled N	Pooled num +	Pooled p	Pooled SE	z (>=1.96 for 95% Conf)	P-value
	49	16	0.326531	0.134012	4.97468	6.53544e-07
	unc-22			bli-1
	comparison	pvalue		comparison	pvalue
	N2 males vs. F1 gfp progeny	1.53744e-12		N2 males vs. F1 gfp progeny	0	***compared to N2 males from rde4 spreadsheet
	N2 males vs. F1 resuce progeny	0.00160035		N2 males vs. F1 resuce progeny	ns
	WM49 v F1 rescue progeny	0
