# Supplementary material for: Target-specific requirements for RNA interference can arise through restricted RNA amplification despite the lack of specialized pathways
Source: eLife. 2024 Aug 20;13:RP97487. doi: 10.7554/eLife.97487 (PMC11335349; doi:10.7554/eLife.97487)
Supplement: Figure 6—source data 1. [file elife-97487-fig6-data1.xlsx]

## Sheet: Sheet1
Strain	unc.strong	unc.weak	non.twitch
P0->F1	105	1	0
1	69	7	18
2	83	3	5
3	86	3	3
4	87	2	4
5	51	12	47
6	54	7	43
7	56	4	52
8	39	6	79
Always_unc22	50	1	4
