# Supplementary material for: Target-specific requirements for RNA interference can arise through restricted RNA amplification despite the lack of specialized pathways
Source: eLife. 2024 Aug 20;13:RP97487. doi: 10.7554/eLife.97487 (PMC11335349; doi:10.7554/eLife.97487)
Supplement: Table 3—source data 1. [file elife-97487-table3-data1.xlsx]

## Sheet: Sheet1
Figure	Comparison	Total n	Silenced n	p value	Strains	notes
1B bli-1	wild type vs mut-16(jam138)	757, 229	391, 0	<0.00001, *	EG6787, AMJ1023	pooled EG6787 from separate experiments
1B bli-1	wild type vs mut-16(jam140)	757, 277	391, 0	<0.00001, *	EG6787, AMJ1035	pooled EG6787 from separate experiments
1B bli-1	wild type vs mut-16(jam141)	757, 124	391, 0	<0.00001, *	EG6787, AMJ1042	pooled EG6787 from separate experiments
1B bli-1	wild type vs mut-16(jam247)	757, 446	391, 1	<0.00001, *	EG6787, AMJ1091	pooled EG6787 from separate experiments
1B bli-1	wild type vs mut-16(jam139) rde-10(jam248)	757, 412	391, 1	<0.00001, *	EG6787, AMJ1025	pooled EG6787 from separate experiments
1B unc-22	wild type vs mut-16(jam139) rde-10(jam248)	309, 173	282, 0	<0.00001, *	EG6787, AMJ1025	pooled EG6787 from separate experiments
1B unc-22	mut-16(jam138) vs mut-16(jam139) rde-10(jam248)	180, 173	111, 0	<0.00001, *	AMJ1023, AMJ1025	pooled EG6787 from separate experiments
1B unc-22	mut-16(jam140) vs mut-16(jam139) rde-10(jam248)	91, 173	50, 0	<0.00001, *	AMJ1035, AMJ1025	pooled EG6787 from separate experiments
1B unc-22	mut-16(jam141) vs mut-16(jam139) rde-10(jam248)	267, 173	208, 0	<0.00001, *	AMJ1042, AMJ1025	pooled EG6787 from separate experiments
1B unc-22	mut-16(jam247) vs mut-16(jam139) rde-10(jam248)	100, 173	84, 0	<0.00001, *	AMJ1091, AMJ1025	pooled EG6787 from separate experiments
1D bli-1	wild type vs mut-16(jam148)	202, 126	159, 0	<0.00001, *	N2, AMJ1397
1D bli-1	wild type vs mut-16(jam148) rde-10(jam196)	202, 209	159, 0	<0.00001, *	N2, AMJ1470
1D bli-1	wild type vs rde-10(jam206)	202, 209	159, 0	<0.00001, *	N2, AMJ1489
1D unc-22	wild type vs mut-16(jam148)	206, 121	204, 119	0.58802, ns	N2, AMJ1397
1D unc-22	wild type vs mut-16(jam148) rde-10(jam196)	206, 146	204, 0	<0.00001, *	N2, AMJ1470
1D unc-22	wild type vs rde-10(jam206)	206, 190	204, 185	0.21023, ns	N2, AMJ1489
2B bli-1	wild type vs nrde-3(jam205)	295, 274	172, 16	<0.00001, *	N2, AMJ1510
2B bli-1	wild type vs rde-10(jam206); nrde-3(jam205)	295, 219	172, 0	<0.00001, *	N2, AMJ1568
2B bli-1	wild type vs mut-16(jam148); nrde-3(jam205)	295, 121	172, 0	<0.00001, *	N2, AMJ1545
2B unc-22	wild type vs nrde-3(jam205)	129, 110	127, 108	0.87221, ns	N2, AMJ1510
2B unc-22	wild type vs rde-10(jam206); nrde-3(jam205)	129, 111	127, 0	<0.00001, *	N2, AMJ1568
2B unc-22	wild type vs mut-16(jam148); nrde-3(jam205)	129, 101	127, 0	<0.00001, *	N2, AMJ1545
2E	wild type vs mut-16(jam148)	183, 107	179, 5	<0.00001, *	N2, AMJ1397
2E	wild type vs rde-10(jam206)	183, 116	179, 16	<0.00001, *	N2, AMJ1489
2E	wild type vs nrde-3(jam205)	183, 105	179, 72	<0.00001, *	N2, AMJ1510
2E	mut-16(jam148) vs rde-10(jam206)	107, 116	5, 16	0.0190241, *	AMJ1397, AMJ1489
2E	rde-10(jam206) vs nrde-3(jam205)	116, 105	16, 72	<0.00001, *	AMJ1489, AMJ1510
2F unc-54	wild type vs mut-16(jam148)	148, 124	142, 2	<0.00001, *	N2, AMJ1397
2F unc-54	wild type vs rde-10(jam206)	148, 128	142, 2	<0.00001, *	N2, AMJ1489
2F unc-54	wild type vs nrde-3(jam205)	148, 263	142, 49	<0.00001, *	N2, AMJ1510	Fed on a different day with similar N2 silencing 164/171 animals showing Unc-54
2F unc-54	wild type vs mut-16(jam148) rde-10(jam196)	148, 159	142, 0	<0.00001, *	N2, AMJ1470
2F unc-54	wild type vs mut-16(jam148); nrde-3(jam205)	148, 166	142, 0	<0.00001, *	N2, AMJ1545	Fed on a different day with similar N2 silencing 164/171 animals showing Unc-54
2F unc-54	wild type vs rde-10(jam206); nrde-3(jam205)	148, 206	142, 0	<0.00001, *	N2, AMJ1568	Fed on a different day with similar N2 silencing 164/171 animals showing Unc-54
2F unc-54	nrde-3(jam205) vs mut-16(jam148)	263, 124	49, 2	<0.00001, *	AMJ1510, AMJ1397
2F unc-54	nrde-3(jam205) vs rde-10(jam206)	263, 128	49, 2	<0.00001, *	AMJ1510, AMJ1489
2F dpy-7	wild type vs mut-16(jam148)	322, 130	279, 34	<0.00001, *	N2, AMJ1397
2F dpy-7	wild type vs rde-10(jam206)	322, 159	279, 2	<0.00001, *	N2, AMJ1489
2F dpy-7	wild type vs nrde-3(jam205)	322, 126	279, 3	<0.00001, *	N2, AMJ1510
2F dpy-7	wild type vs mut-16(jam148) rde-10(jam196)	322, 184	279, 0	<0.00001, *	N2, AMJ1470
2F dpy-7	wild type vs mut-16(jam148); nrde-3(jam205)	322, 99	279, 0	<0.00001, *	N2, AMJ1545
2F dpy-7	wild type vs rde-10(jam206); nrde-3(jam205)	322, 180	279, 0	<0.00001, *	N2, AMJ1568
2F dpy-7	mut-16(jam148) vs rde-10(jam206)	130, 159	34, 2	<0.00001, *	AMJ1397, AMJ1489
2F dpy-7	mut-16(jam148) vs nrde-3(jam205)	130, 126	34, 6	<0.00001, *	AMJ1397, AMJ1510
3B	wild type vs eri-1(mg366)	200, 200	134, 145	0.231163, ns	N2, GR1373	N2 from a second experiment showed comparable values (219/304), GR1373 from a second experiment showed comparable values (169/213)
3B	nrde-3(jam205) vs eri-1(mg366); nrde-3(tm1116)	143, 200	3, 167	0.000132, *	N2, AMJ489
3B	mut-16(148/268) vs mut-16(jam265-7); eri-1(jam263)	172, 354	0, 0	>0.5, ns	AMJ1397, AMJ1675, AMJ1672-4	AMJ1397 (0/110) and AMJ1675 (0/123) were pooled; AMJ1672 (0/130), AMJ1673 (0/88), and AMJ1674 (0/111) were pooled
3B	rde-10(jam206) vs rde-10(jam206); eri-1(mg366)	233, 329	0, 0	>0.5, ns	AMJ1489, AMJ1622, AMJ1623	AMJ1622 (0/171) and AMJ1623 (0/183) were pooled
3B	nrde-3(jam205) vs eri-1(mg366); nrde-3(jam205)	143, 169	3, 130	<0.00001, *	AMJ1510, AMJ1621
3C	mut-16(jam148/240) rde-10(jam196/206) vs. mut-16(jam240) rde-10(jam 206); eri-1(jam260-2)	149, 191	1, 10	0.01826, *	AMJ1470, AMJ1611, AMJ1657-9	AMJ1470 (0/32) and AMJ1661 (1/116) were pooled; AMJ1657 (9/75), AMJ1658 (0/56), and AMJ1659 (1/50) were pooled
3C	rde-10(jam206); nrde-3(jam205) vs rde-10(jam206); eri-1(mg366); nrde-3(jam205)	113, 265	6, 18	0.58837, ns	AMJ1568, AMJ1624, AMJ1625	AMJ1624 (4/135) and AMJ1625 (14/112) were pooled
3C	mut-16(jam148); nrde-3(jam205) vs mut-16(jam148); eri-1(mg366); nrde-3(jam205)	28, 110	4, 1	0.00072, *	AMJ1545, AMJ1631, AMJ1632	AMJ1631 (1/52) and AMJ1632 (0/57) were pooled
3D bli-1	wild type vs rde-1(ne219)	50, 37	41, 0	<0.00001, *	N2, WM27	N2 data from rde-4(-) experiment; N2 data from rde-1(-) experiment (not shown) is comparable with 41/50 silenced
3D bli-1	wild type vs rde-4(ne301)	40, 50	40, 0	<0.00001, *	N2, WM49	N2 data from rde-4(-) experiment; N2 data from rde-1(-) experiment (not shown) is comparable with 41/50 silenced
3D bli-1	wild type vs Si[mex-5p::rde-1(+)]/+; rde-1(ne219)	50, 33	41, 0	<0.00001, *	N2, AMJ345	N2 data from rde-4(-) experiment; N2 data from rde-1(-) experiment (not shown) is comparable with 41/50 silenced
3D bli-1	wild type vs Si[mex-5p::rde-4(+)]/+; rde-4(ne301)	40, 41	40, 41	>0.5, ns	N2, AMJ285	N2 data from rde-4(-) experiment; N2 data from rde-1(-) experiment (not shown) is comparable with 41/50 silenced
3D unc-22	wild type vs rde-1(ne219)	25, 25	25, 0	<0.00001, *	N2, WM27
3D unc-22	wild type vs rde-4(ne301)	25, 25	25, 0	<0.00001, *	N2, WM49
3D unc-22	wild type vs Si[mex-5p::rde-1(+)]/+; rde-1(ne219)	25, 24	25, 2	<0.00001, *	N2, AMJ345
3D unc-22	wild type vs Si[mex-5p::rde-4(+)]/+; rde-4(ne301)	25, 24	25, 16	0.001600, †	N2, AMJ285	† indicates statistical significance vs. wild type and vs. rde-4(ne301) mutant
3D unc-22	rde-4(ne301) vs Si[mex-5p::rde-4(+)]/+; rde-4(ne301)	25, 24	0, 16	<0.00001, †	WM49, AMJ285	† indicates statistical significance vs. wild type and vs. rde-4(ne301) mutant
3E	wild type vs rde-4(ne301); nrde-3(tm1116)	150, 200	142, 0	<0.00001, *	N2, AMJ183
3E	wild type vs rde-4(ne301); nrde-3(tm1116); Si[nas-9p::rde-4(+)]	150, 150	142, 98	<0.00001, †	N2, AMJ611	† indicates statistical significance vs. wild type and vs. rde-4(ne301); nrde-3(tm1116) mutant
3E	rde-4(ne301); nrde-3(tm1116); vs rde-4(ne301); nrde-3(tm1116); Si[nas-9p::rde-4(+)]	200, 150	0, 98	<0.00001, †	AMJ183, AMJ611	† indicates statistical significance vs. wild type and vs. rde-4(ne301); nrde-3(tm1116) mutant
3F	wild type vs eri-1(mg366); nrde-3(jam205)	282, 140	85, 69	0.0001199, *	N2, AMJ1621
3F	wild type vs rde-10(jam206); eri-1(mg366)	282, 279	85, 0	<0.00001, *	N2, AMJ1622
3F	wild type v Si[nas-9p::rde-4(+)]; rde-10(jam206)	282, 180	85, 6	<0.00001, *	N2, AMJ1723
3F	wild type v Si[nas-9p::rde-4(+)]; rde-10(jam206); eri-1(mg366)	282, 202	85, 0	<0.00001, *	N2, AMJ1724
3F	wild type vs mut-16(jam148); eri-1(mg366)	282, 70	85, 0	<0.00001, *	N2, AMJ1672
3F	wild type v Si[nas-9p::rde-4(+)]; mut-16(jam148)	282, 152	85, 0	<0.00001, *	N2, AMJ1721
3F	wild type v Si[nas-9p::rde-4(+)]; mut-16(jam148); eri-1(mg366)	282, 187	85, 0	<0.00001, *	N2, AMJ1722
5B	wild type vs bli-1(jam307)	488, 443	390, 425	<0.00001, *	N2, AMJ1754
5B	wild type vs bli-1(jam308)	488, 245	390, 185	0.170996, ns	N2, AMJ1755
5B	wild type vs nrde-3(jam205)	488, 377	390, 111	<0.00001, *	N2, AMJ1510
5B	bli-1(jam307) vs bli-1(jam307); nrde-3(jam205)	443, 459	425, 313	<0.00001, *	AMJ1754, AMJ1758
5B	nrde-3(jam205) vs bli-1(jam307); nrde-3(jam205)	377, 459	111, 313	<0.00001, *	AMJ1510, AMJ1758
5B	bli-1(jam308) vs bli-1(jam308); nrde-3(jam205)	245, 117	185,38	<0.00001, *	AMJ1755, AMJ1771
5B	nrde-3(jam205) vs bli-1(jam308); nrde-3(jam205)	377, 117	111, 38	0.531973, ns	AMJ1510, AMJ1771
5D	bli-1p::gfp vs mut-16(jam148); bli-1p::gfp	21, 25	21, 6	<0.00001, *	AMJ1709, AMJ1727
5D	bli-1p::gfp vs rde-10(jam206); bli-1p::gfp	21, 25,	21, 9	<0.00001, *	AMJ1709, AMJ1725
5D	bli-1p::gfp vs nrde-3(jam205); bli-1p::gfp	21, 25	21, 23	0.18508, ns	AMJ1709, AMJ1726
5D	bli-1p::gfp vs mut-16(jam148)rde-10(jam196); bli-1p::gfp	21, 20	21, 0	<0.00001, *	AMJ1709, AMJ1728
6A	1 vs 2 days post RNAi	94, 91	76, 86	0.00489, *	N2
6A	1 vs 3 days post RNAi	94, 92	76, 89	0.00062, *	N2
6A	1 vs 4 days post RNAi	94, 93	76, 89	0.001627, *	N2
6A	5 days post RNAi versus 7 days on RNAi	110, 55	63, 51	<0.00001, *	N2
6A	6 days post RNAi versus 7 days on RNAi	104, 55	61, 51	<0.00001, *	N2
6A	7 days post RNAi versus 7 days on RNAi	112, 55	60, 51	<0.00001, *	N2
6A	8 days post RNAi versus 7 days on RNAi	124, 55	45, 51	<0.00001, *	N2
S2B	wild type vs rde-10(jam243)	115, 102	115, 100	0.13140071, ns	N2, AMJ1614
S2B	wild type vs mut-16(jam240) rde-10(jam206)	115, 137	115, 5	<0.00001, *	N2, AMJ1611
S2C	wild type vs mut-16(jam268)	322, 74	279, 20	<0.00001, *	N2, AMJ1675	From the same feed in Fig. 2E
S6B	wild type unc-22 vs wild type pL4440	138, 116	138, 0	<0.00001, *	N2
S6B	wild type unc-22 vs nrde-3(jam205) unc-22	138, 110	138, 79	<0.00001, *	N2, AMJ1510
S6B	unc-22(jam300) unc-22 vs unc-22(jam300) pL4440	101, 113	101, 101	0.00128, *	AMJ1730
S6B	unc-22(jam301) unc-22 vs unc-22(jam301) pL4440	101, 65	101, 49	<0.00001, *	AMJ1731
S6B	unc-22(jam300); nrde-3(jam205) unc-22 vs unc-22(jam300); nrde-3(jam205) pL4440	82, 108	70, 83	0.14214, ns	AMJ1757
S6B	unc-22(jam300); nrde-3(jam205) unc-22 vs unc-22(jam300) unc-22	82, 101	70, 101	<0.00001, *	AMJ1757, AMJ1730
S6B	unc-22(jam300); nrde-3(jam205) unc-22 vs nrde-3(jam205) unc-22	82110	70, 79	0.02592, *	AMJ1757, AMJ1510
